# Supplementary material for: Clinical evaluation of the Abbott Alinity SARS-CoV-2 spike-specific quantitative IgG and IgM assays in infected, recovered, and vaccinated groups
Source: bioRxiv or medRxiv preprint supplement (doi:10.1101/2021.02.17.21251940), 2021-02-19
Supplement: Supplementary file [file media-1.pdf]

**TABLE s1** SARS-CoV-2 IgG<sub>SP</sub> and IgM<sub>SP</sub> positive agreement by days post RT-PCR verification

| <b>Days post RT-PCR verification, DPCR<sup>a</sup></b> | <b>IgG<sub>SP</sub> positivity rate (%)</b> | <b>IgM<sub>SP</sub> positivity rate (%)</b> | <b>IgG<sub>SP</sub> or IgM<sub>SP</sub> positivity rate (%)</b> |
|--------------------------------------------------------|---------------------------------------------|---------------------------------------------|-----------------------------------------------------------------|
| <5                                                     | 67/118 (56.8)                               | 71/118 (60.2)                               | 79/118 (66.9)                                                   |
| 6-10                                                   | 79/107 (73.8)                               | 79/107 (73.8)                               | 87/107 (81.3)                                                   |
| 11-15                                                  | 55/67 (82.1)                                | 53/67 (79.1)                                | 58/67 (86.6)                                                    |
| 16-20                                                  | 22/22 (100)                                 | 22/22 (100)                                 | 22/22 (100)                                                     |
| >20                                                    | 44/45 (97.8)                                | 37/45 (82.2)                                | 45/45 (100)                                                     |
| <b>Total</b>                                           | 270/359 (75.2)                              | 262/359 (72.9)                              | 291/359 (81.1)                                                  |

<sup>a</sup> For RT-PCR confirmed SARS-CoV-2 cases.

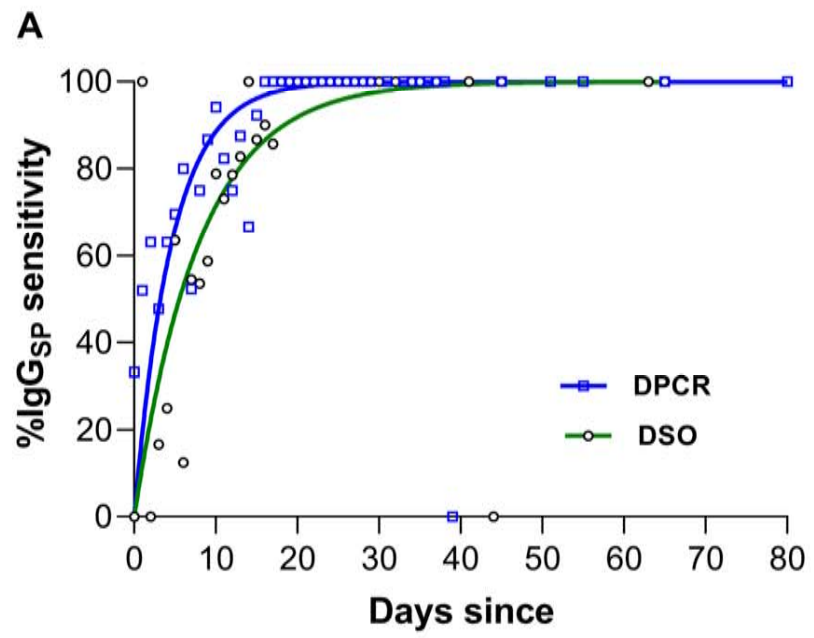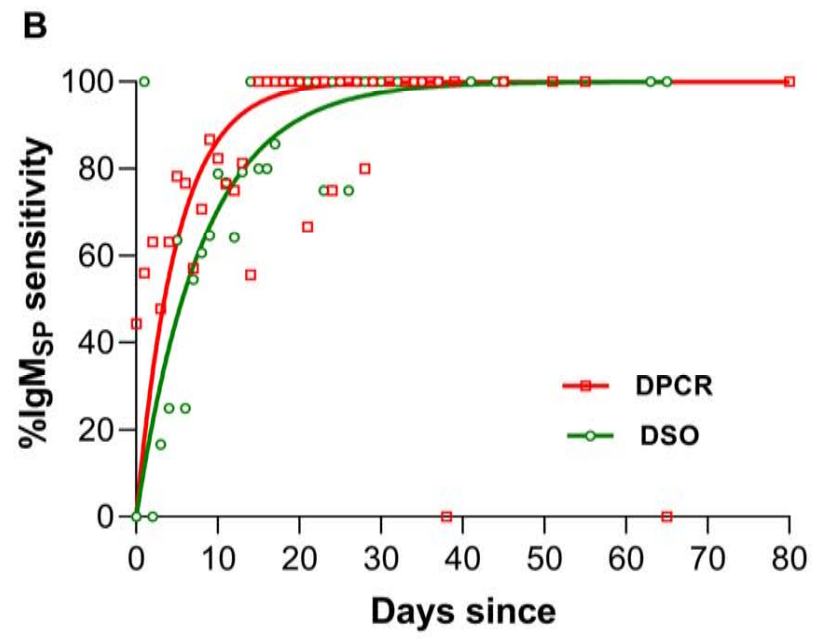

Fig. s1

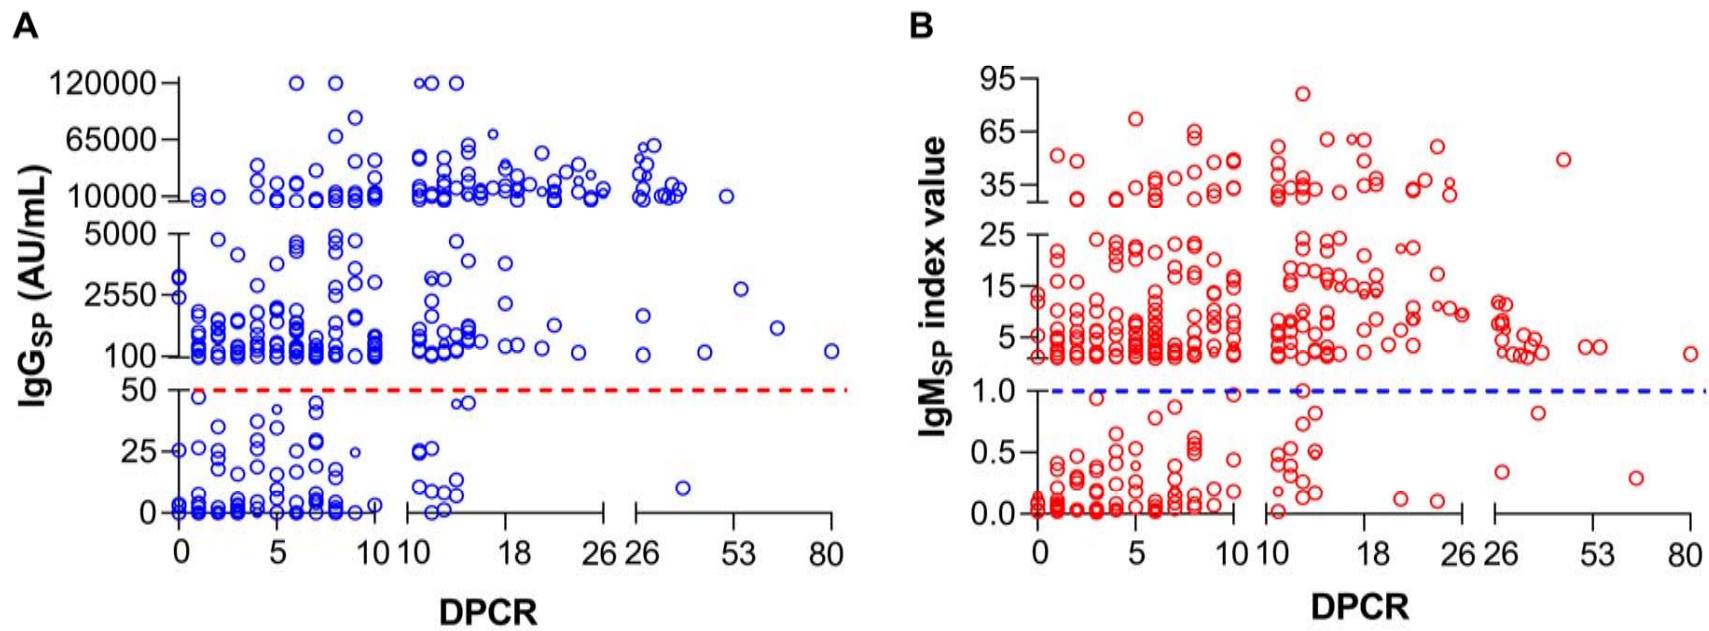

Fig. s2

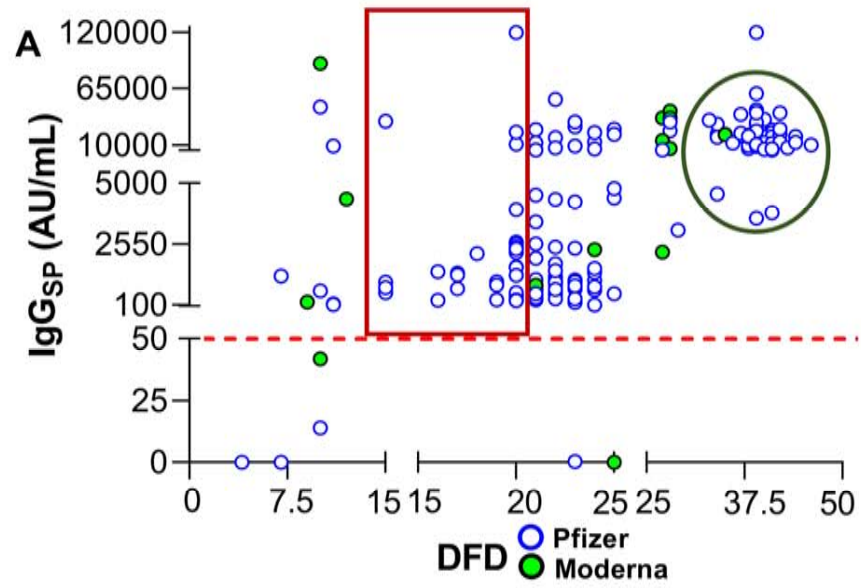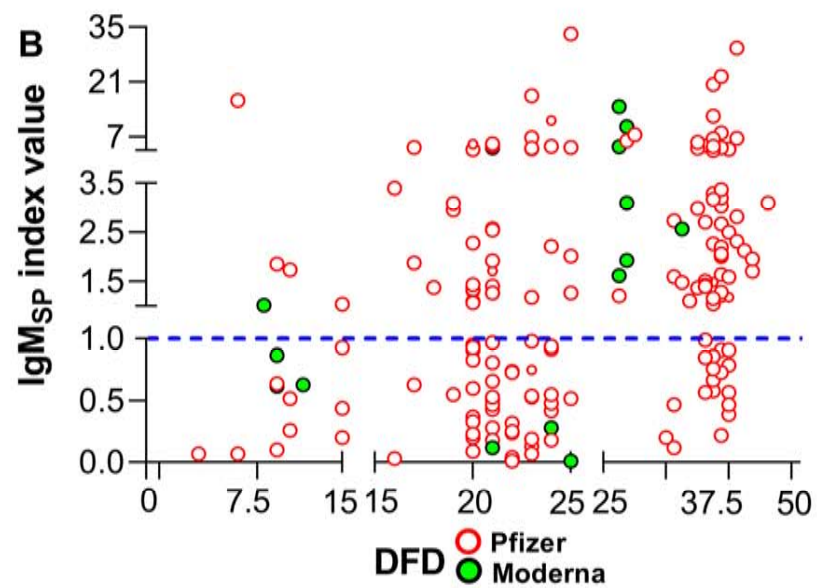

Fig. s3

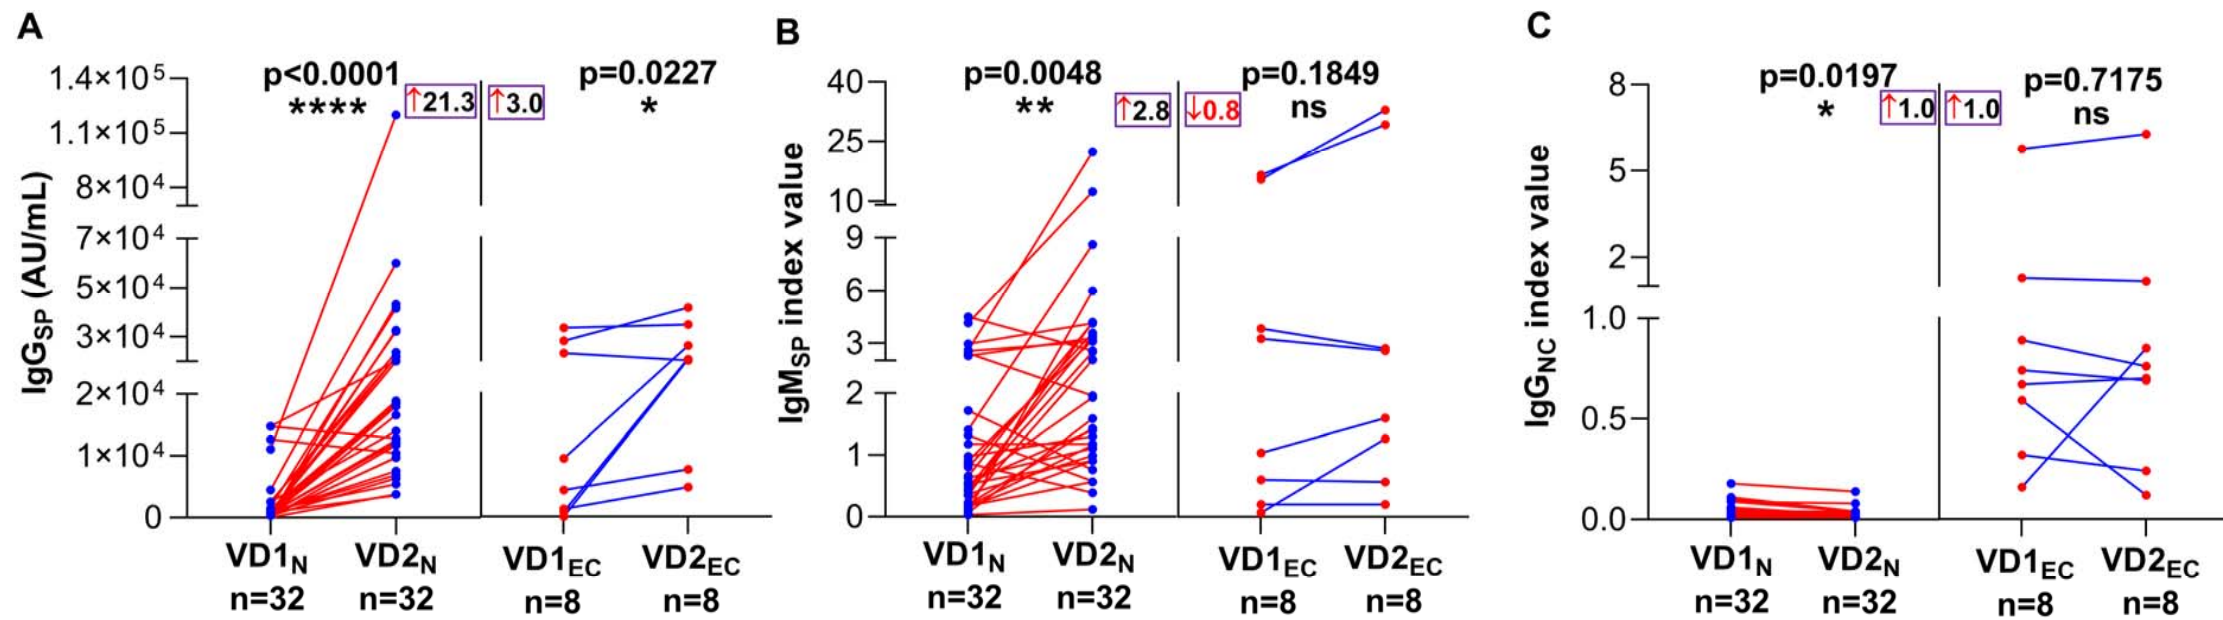

Fig. s4
